# Supplementary material
Source: HighWire-hosted journal article supplement (https://bmjopen.bmj.com/content/8/12/e025630)
Supplement: inline-supplementary-material-1 [file inline-supplementary-material-1.pdf]

**PHYSICIAN ORDERS  
FOR**

**Study Protocol:**  
dexamethasone versus predniSONE for  
asthma treatment in the pediatric inpatient  
population; a feasibility study.

Protocol: June 2018  
CHEOREB#17/08E

Patient Identification

Study ID #: PredDex-\_\_\_\_\_

Allergies: \_\_\_\_\_

Weight: \_\_\_\_\_ kg

First dose of systemic corticosteroid in ED received at (date and time): \_\_\_/\_\_\_/\_\_\_ \_\_:\_\_\_

\_\_\_\_\_ **Randomized to predniSONE/prednisoLONE:**

\*Deviations of up to 10% of the recommended mg dose per kilogram will be permitted for the purpose of the pharmacist rounding to available dosage forms

\_\_\_\_\_ Discontinue oral steroid treatment for asthma ordered upon admission (to avoid duplication of therapy)

\_\_\_\_\_ **predniSONE or prednisoLONE** \_\_\_\_\_ mg (1 mg/kg/dose; MAX 50 mg; **Dose to be rounded to the nearest 0.5 mg upon initial prescribing**) PO daily x 4 days starting 24 hours after first dose in Emergency Department (ED), and at least 6 hours after dose of IV steroids in ED.

For Pharmacy Use Only – Dispense:

- predniSONE 1 mg tablet
- predniSONE 5 mg tablet
- prednisone 50 mg tablet
- predniSONE 5 mg/mL oral suspension
- prednisoLONE 1 mg/mL oral solution

\_\_\_\_\_  
PHYSICIAN SIGNATURE

\_\_\_\_\_  
PRINT NAME OF PHYSICIAN

\_\_\_\_\_  
DATE & TIME

Original Copy – Chart

Copy to Pharmacy

Date: July 2018

Created by: DG/RV

**PHYSICIAN ORDERS  
FOR**

**Study Protocol:**  
dexamethasone versus predniSONE for  
asthma treatment in the pediatric inpatient  
population; a feasibility study.

Protocol June 2018  
CHEOREB#17/08E

Patient Identification

Study ID #: PredDex-\_\_\_\_\_

Allergies: \_\_\_\_\_

Weight: \_\_\_\_\_ kg

First dose of systemic corticosteroid in ED received at (date and time): \_\_\_/\_\_\_/\_\_\_ \_\_:\_\_\_

\_\_\_\_\_ **Randomized to dexamethasone:**

\*Deviations of up to 10% of the recommended mg dose per kilogram will be permitted for the purpose of the pharmacist rounding to available dosage forms

\_\_\_\_\_ Discontinue oral steroid treatment for asthma ordered upon admission (to avoid duplication of therapy)

**TOP UP DOSE (for patients receiving prednisone/prednisolone OR dexamethasone in ED to a target of 0.6 mg/kg TOTAL dexamethasone or equivalent)**

**NOTE:** Please verify steroid and mg/kg dose in EPIC before ordering. If patient received dexamethasone 0.6 mg/kg/dose (OR more than 16 mg) in ED or IV steroids, **DO NOT GIVE TOP UP DOSE**. Standard doses according to the ED Medical Directive are 0.3 mg/kg/dose of dexamethasone (MAX 10 mg) and 2 mg/kg/prednisone/prednisolone (MAX 50 mg).

**IF RECEIVED DEXAMETHASONE IN ED:**

Dose: \_\_\_\_\_ mg ÷ \_\_\_\_\_ kg (pt weight) = \_\_\_\_\_ (A) mg/kg/dose

- Top-up dose **NOT REQUIRED** (received 0.6 mg/kg/dose OR greater or equal to 16 mg in ED)
- Top-up dose **REQUIRED** ( \_\_\_\_\_ mg (0.6 mg/kg/dose) - \_\_\_\_\_ (A) mg/kg/dose = \_\_\_\_\_ (B) mg/kg/dose)

\_\_\_\_\_ **Dexamethasone** \_\_\_\_\_ mg ( \_\_\_\_\_ (B) mg/kg/dose; MAX 16 mg/dose **INCLUDING** dose received in ED; **Dose to be rounded to the nearest 0.25 mg upon initial prescribing**) PO x 1 STAT upon randomization

**THEN**

\_\_\_\_\_ **Dexamethasone** \_\_\_\_\_ mg (0.6 mg/kg/dose; MAX 16 mg; **Dose to be rounded to the nearest 0.25 mg upon initial prescribing**) PO x 1 dose 24 hours after first dose of **steroid** in ED

For Pharmacy Use Only – Dispense:

- dexamethasone 0.5 mg tablet
- dexamethasone 4 mg tablet
- dexamethasone 1 mg/mL oral suspension

\_\_\_\_\_  
PHYSICIAN SIGNATURE

\_\_\_\_\_  
PRINT NAME OF PHYSICIAN

\_\_\_\_\_  
DATE & TIME

Original Copy – Chart

Copy to Pharmacy

Date: July 2018

Created by: DG/RV

**PHYSICIAN ORDERS  
FOR**

**Study Protocol:**  
dexamethasone versus predniSONE for  
asthma treatment in the pediatric inpatient  
population; a feasibility study.

Protocol June 2018  
CHEOREB#17/08E

Patient Identification

Study ID #: PredDex-\_\_\_\_\_

Allergies: \_\_\_\_\_

Weight: \_\_\_\_\_ kg

First dose of systemic corticosteroid in ED received at (date and time): \_\_\_/\_\_\_/\_\_\_ \_\_:\_\_\_

\_\_\_\_\_ **Randomized to dexamethasone:**

\*Deviations of up to 10% of the recommended mg dose per kilogram will be permitted for the purpose of the pharmacist rounding to available dosage forms

\_\_\_\_\_ Discontinue oral steroid treatment for asthma ordered upon admission (to avoid duplication of therapy)

**TOP UP DOSE (for patients receiving prednisone/prednisolone OR dexamethasone in ED to a target of 0.6 mg/kg TOTAL dexamethasone or equivalent)**

**Patient who received IV steroids in ED do not qualify for top up dose.**

**NOTE:** Please verify steroid and mg/kg dose in EPIC before ordering. Standard doses according to the ED Medical Directive are 0.3 mg/kg/dose of dexamethasone (MAX 10 mg) and 2 mg/kg/prednisone/prednisolone (MAX 50 mg).

**IF RECEIVED PREDNISONE/PREDNISOLONE IN ED:**

\_\_\_\_\_ **Dexamethasone** \_\_\_\_\_ mg (0.3 mg/kg/dose; MAX 8 mg; Dose to be rounded to the nearest 0.25 mg upon initial prescribing)  
PO x 1 STAT upon randomization

**THEN**

\_\_\_\_\_ **Dexamethasone** \_\_\_\_\_ mg (0.6 mg/kg/dose; MAX 16 mg; Dose to be rounded to the nearest 0.25 mg upon initial prescribing)  
PO x 1 dose 24 hours after first dose of **steroid** in ED

For Pharmacy Use Only – Dispense:

- dexamethasone 0.5 mg tablet
- dexamethasone 4 mg tablet
- dexamethasone 1 mg/mL oral suspension

\_\_\_\_\_  
PHYSICIAN SIGNATURE

\_\_\_\_\_  
PRINT NAME OF PHYSICIAN

\_\_\_\_\_  
DATE & TIME

Original Copy – Chart

Copy to Pharmacy

Date: July 2018

Created by: DG/RV
