# Supplementary material
Source: HighWire-hosted journal article supplement (https://bmjopen.bmj.com/content/8/12/e025630)
Supplement: inline-supplementary-material-3 [file inline-supplementary-material-3.pdf]

dexamethasone phosphate 1 mg/mL suspension (CHEO) - FIRST choice

0.3 mg/kg/dose, Oral, Once, For 1 Doses  
If oral steroid not already given as per medical directive.

Usual dose: 0.3mg/kg/dose, MAX 10 mg.

predniSONE tablet - FIRST choice

2 mg/kg/dose, Oral, Once, For 1 Doses  
If oral steroid not already given as per medical directive.

Usual dose: 2 mg/kg/dose. MAX 50 mg.

prednisoLONE 1 mg/mL solution - SECOND choice

2 mg/kg/dose, Oral, Once, For 1 Doses  
If oral steroid not already given as per medical directive.

Usual dose: 2 mg/kg/dose. MAX 50 mg.

predniSONE 5 mg/mL suspension (CHEO) - LAST Choice

2 mg/kg/dose, Oral, Once, For 1 Doses  
If oral steroid not already given as per medical directive.

Usual dose: 2 mg/kg/dose. MAX 50 mg.

**For PRAM score of 8-12 (severe)**

Salbutamol/Ipratropium Nebules - Select ONLY if not already ordered under medical directive

Select ONLY if not already ordered under medical directive.

salbutamol inhalation solution

Nebulization, Every 20 minutes, Starting today, For 3 Doses

If not already given as per medical directive

Usual dose: 3 to 6 kg: 0.625 mg = 1/2 of a 1.25 mg nebule (administer with 2 mL 0.9 % NaCl),

6 - 12 kg: 1.25 mg

12 - 20 kg: 2.5 mg

Greater than 20 kg: 5 mg

ipratropium 250 mcg/2 mL inhalation solution

250 mcg, Nebulization, Every 20 minutes, Starting today, For 3 Doses

If not already given as per medical directive.

Oral steroid - Select ONLY if not already ordered under medical directive. (Single Response)

Select ONLY if not already ordered under medical directive.

dexamethasone phosphate 1 mg/mL suspension (CHEO) - FIRST choice

0.3 mg/kg/dose, Oral, Once, For 1 Doses

If oral steroid not already given as per medical directive.

Usual dose: 0.3mg/kg/dose, MAX 10 mg.

predniSONE tablet - FIRST choice

2 mg/kg/dose, Oral, Once, For 1 Doses

If oral steroid not already given as per medical directive.

Usual dose: 2 mg/kg/dose. MAX 50 mg.

prednisoLONE 1 mg/mL solution - SECOND choice

2 mg/kg/dose, Oral, Once, For 1 Doses

If oral steroid not already given as per medical directive.

Usual dose: 2 mg/kg/dose. MAX 50 mg.

predniSONE 5 mg/mL suspension (CHEO) - LAST Choice

2 mg/kg/dose, Oral, Once, For 1 Doses

If oral steroid not already given as per medical directive.

Usual dose: 2 mg/kg/dose. MAX 50 mg.

Salbutamol Nebules/MDI

**"Or" Linked Panel**

After initial 3 salbutamol nebulizations, if clinically improving change to salbutamol MDI

salbutamol inhalation solution

Nebulization, Every 30 minutes PRN  
After initial 3 salbutamol nebulizations, if clinically improving change to salbutamol MDI.

Usual dose: 3 to 6 kg: 0.625 mg = 1/2 of a 1.25 mg nebule (administer with 2 mL 0.9 % NaCl),

6 - 12 kg: 1.25 mg

12 - 20 kg: 2.5 mg

Greater than 20 kg: 5 mg

 salbutamol 100 mcg/puff MDI

Inhalation, Every 30 minutes PRN

After initial 3 salbutamol nebulizations, if clinically improving change to salbutamol MDI.

Usual dose: Less than 6 kg: 200 mcg

6 - 16 kg: 400 mcg

16 - 24 kg: 600 mcg

24 - 34 kg: 800 mcg

Greater than 34 kg: 1000 mcg

Give via spacer device.
