# Supplementary material
Source: HighWire-hosted journal article supplement (https://bmjopen.bmj.com/content/8/12/e025630)
Supplement: inline-supplementary-material-4 [file inline-supplementary-material-4.pdf]

- dexamethasone phosphate 1 mg/mL suspension (CHEO) - FIRST choice
- predniSONE tablet - FIRST choice
- prednisoLONE 1 mg/mL solution - SECOND choice
- predniSONE 5 mg/mL suspension (CHEO) - LAST Choice

0.3 mg/kg/dose, Oral, Once, For 1 Doses  
 If oral steroid not already given as per medical directive.  
 Usual dose: 0.3mg/kg/dose, MAX 10 mg.

2 mg/kg/dose, Oral, Once, For 1 Doses  
 If oral steroid not already given as per medical directive.  
 Usual dose: 2 mg/kg/dose. MAX 50 mg.

2 mg/kg/dose, Oral, Once, For 1 Doses  
 If oral steroid not already given as per medical directive.  
 Usual dose: 2 mg/kg/dose. MAX 50 mg.

2 mg/kg/dose, Oral, Once, For 1 Doses  
 If oral steroid not already given as per medical directive.  
 Usual dose: 2 mg/kg/dose. MAX 50 mg.

Salbutamol Nebules/MDI

After initial 3 salbutamol nebulizations, if clinically improving change to salbutamol MDI

- salbutamol inhalation solution

**"Or" Linked Panel**

Nebulization, Every 30 minutes PRN  
 After initial 3 salbutamol nebulizations, if clinically improving change to salbutamol MDI.  
 Usual dose: 3 to 6 kg: 0.625 mg = 1/2 of a 1.25 mg nebule (administer with 2 mL 0.9 % NaCl),  
 6 - 12 kg: 1.25 mg  
 12 - 20 kg: 2.5 mg  
 Greater than 20 kg: 5 mg

Inhalation, Every 30 minutes PRN  
 After initial 3 salbutamol nebulizations, if clinically improving change to salbutamol MDI.  
 Usual dose: Less than 6 kg: 200 mcg  
 6 - 16 kg: 400 mcg  
 16 - 24 kg: 600 mcg  
 24 - 34 kg: 800 mcg  
 Greater than 34 kg: 1000 mcg  
 Give via spacer device.

- salbutamol 100 mcg/puff MDI

**Other Medications**

- methylPREDNISolone (PF) 62.5 mg/mL injection
- magnesium sulfate in 0.9% NaCl 40 mg/mL injection

1 mg/kg/dose, Intravenous, Once, For 1 Doses  
 Usual dose 1 - 2 mg/kg/dose, MAX 125 mg.  
 If prednisoLONE or predniSONE already given as per medical directive, limit methylPRENISolone dose to 1 mg/kg/dose, MAX 125 mg.

50 mg/kg/dose, Intravenous, Once, For 1 Doses  
 Usual dose: 50 mg/kg/dose, MAX 2000 mg.  
 Give IV over 20 - 30 minutes.
